# Supplementary material for: Facilitating active NiOOH formation via Mo doping towards high-efficiency oxygen evolution
Source: Royal Society of Chemistry journal article supplement (doi:10.1039/d4cy00314d), 2024-01-01
Supplement: d4cy00314d1.pdf [file d4cy00314d1.pdf]

## Supplementary Information

### **Facilitating active NiOOH formation via Mo doping towards high-efficiency oxygen evolution**

Liuqing Wang<sup>a,b,c</sup>, Jinsheng Li<sup>a,c</sup>, Qinglei Meng<sup>a,c</sup>, Meiling Xiao<sup>\*a,b,c</sup>, Changpeng Liu<sup>a,b,c</sup>, Wei Xing<sup>\*a,b,c</sup> and Jianbing Zhu<sup>\*a,b,c</sup>

a. State Key Laboratory of Electroanalytical Chemistry, Laboratory of Advanced Power Sources, Changchun Institute of Applied Chemistry, Chinese Academy of Sciences, Changchun 130022, China.

b. School of Applied Chemistry and Engineering, University of Science and Technology of China, Hefei 230026, China.

c. Jilin Province Key Laboratory of Low Carbon Chemical Power Sources, Changchun 130022, China.

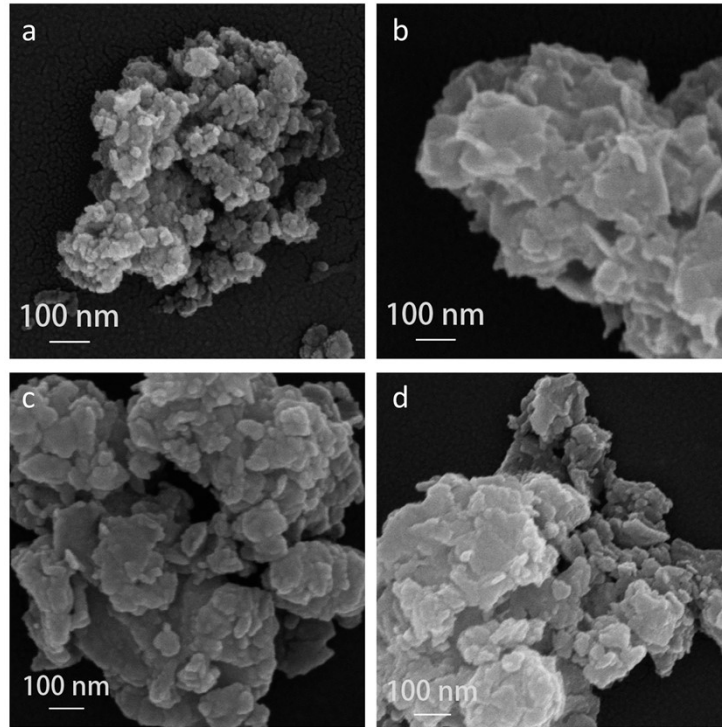

Fig. S1 SEM images of NiFe-LDH, NiFeMo-1, NiFeMo-2 and NiFeMo-3.

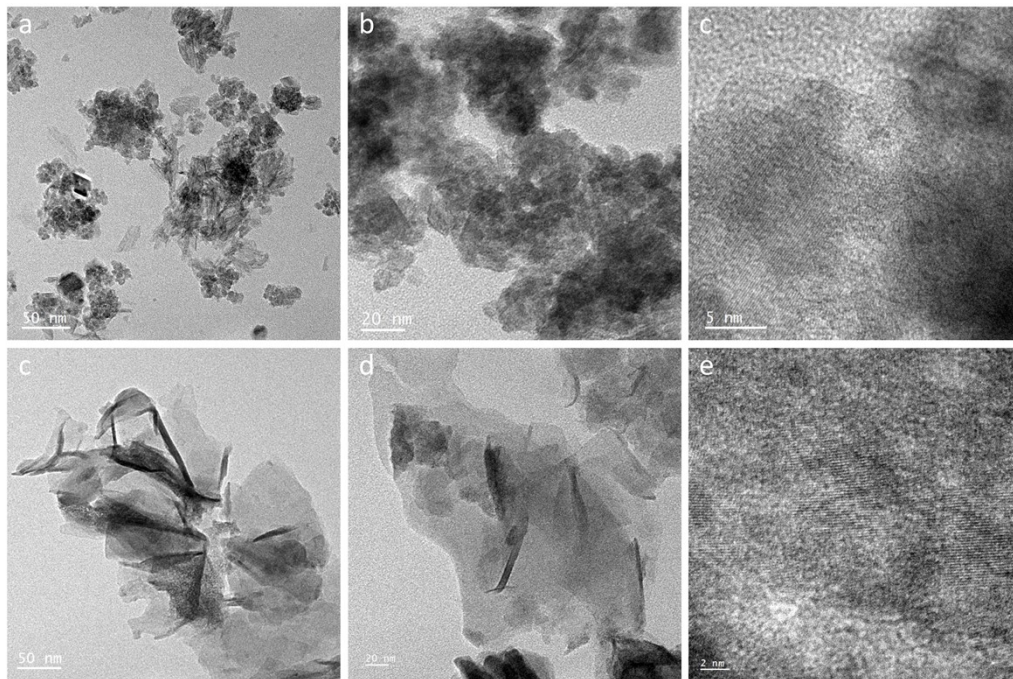

Fig. S2 TEM images of (a-c) NiFe-LDH and (c-e) NiFeMo-2.

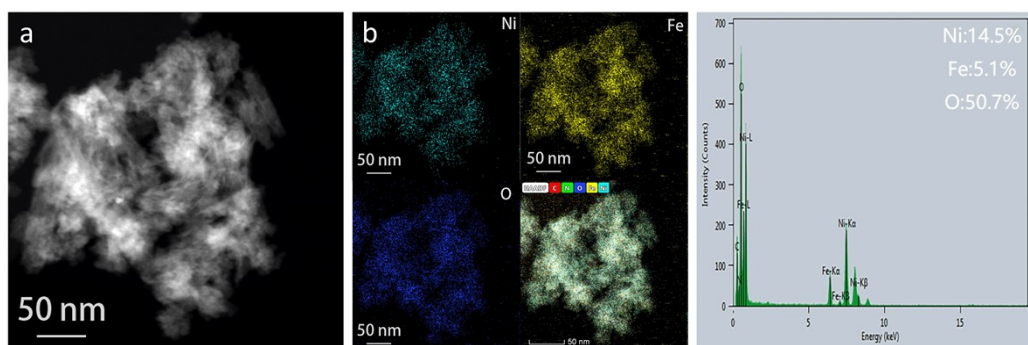

Figure S3. (a) HAADF-STEM image and (b, c) element mapping analysis for NiFe-LDH.

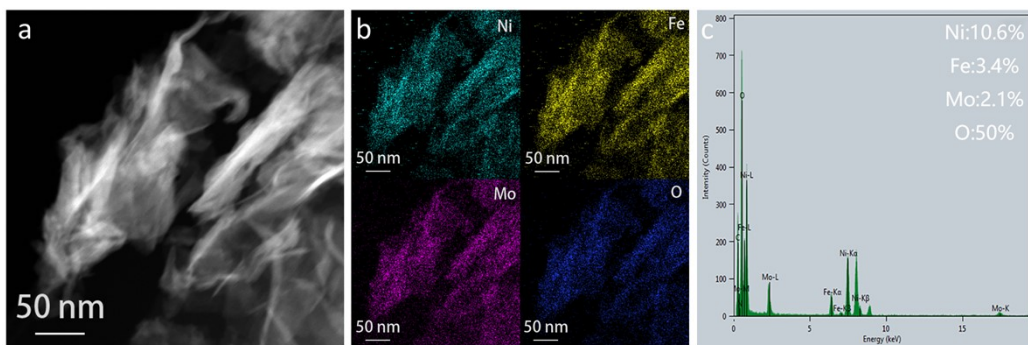

Fig. S4 (a) HAADF-STEM image and (b, c) element mapping analysis for NiFeMo-2

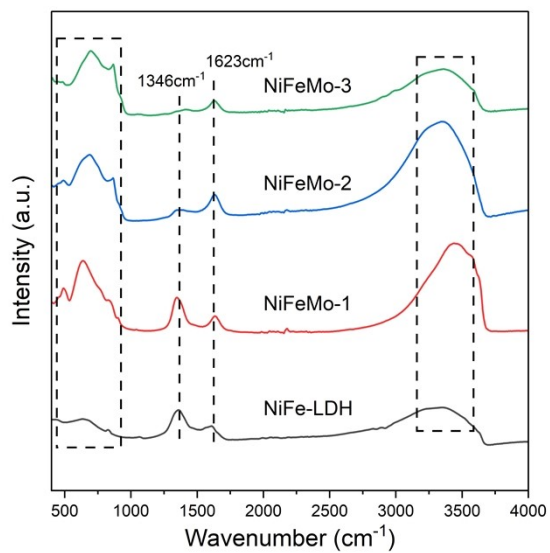

Fig. S5 FTIR spectra of NiFe-LDH, NiFeMo-1, NiFeMo-2 and NiFeMo-3.

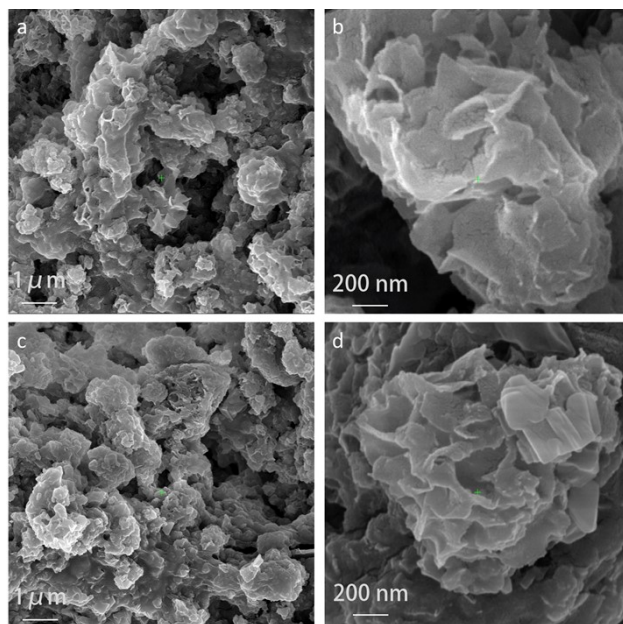

Fig. S6 SEM images of NiFeMo-2 catalyst (a, b) before stability test and (c, d) after stability test.

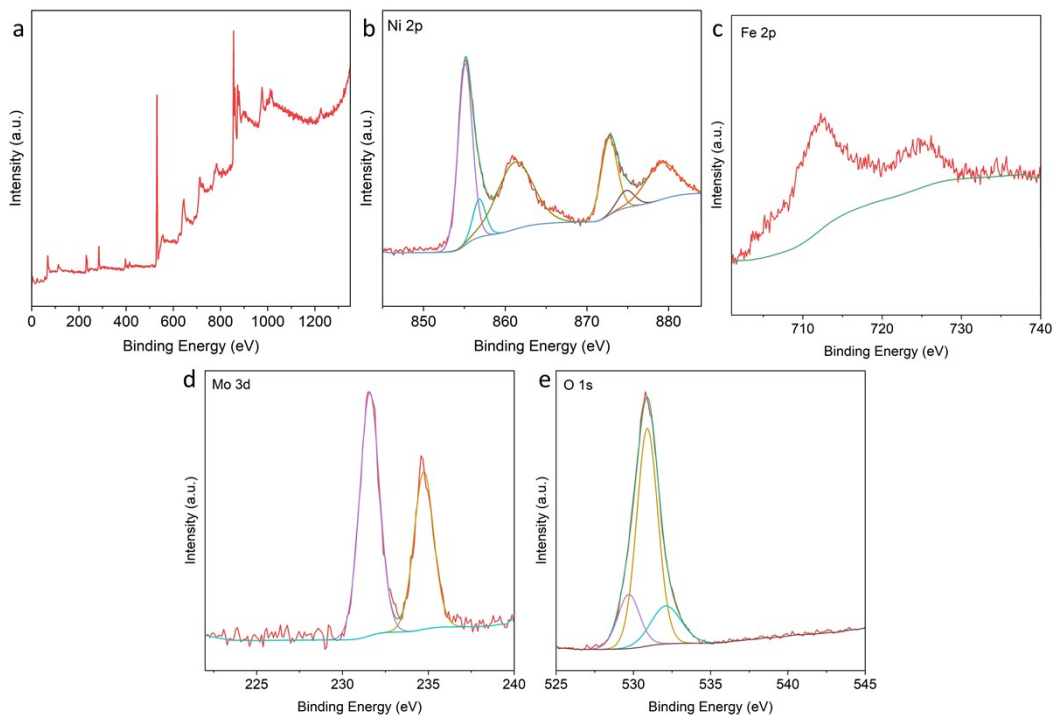

Fig. S7 (a) XPS survey and (b-e) High-resolution XPS spectra: (b) Ni 2p, (c) Fe 2p, (d) Mo 3d, and (e) O 1s of NiFeMo-1 catalyst.

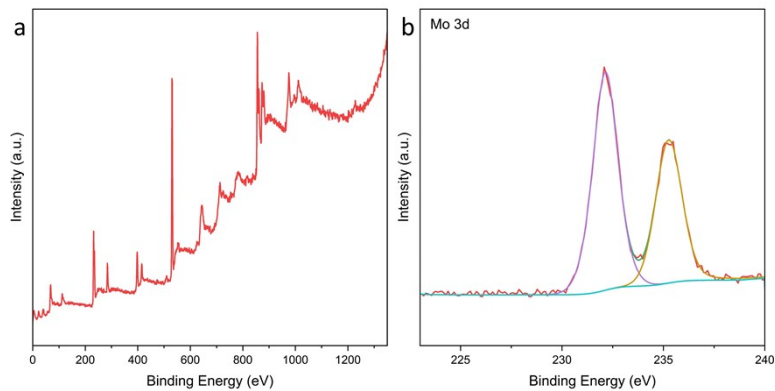

Fig S8 (a) XPS survey and (b) Mo 3d XPS spectra of of NiFeMo-2 catalyst.

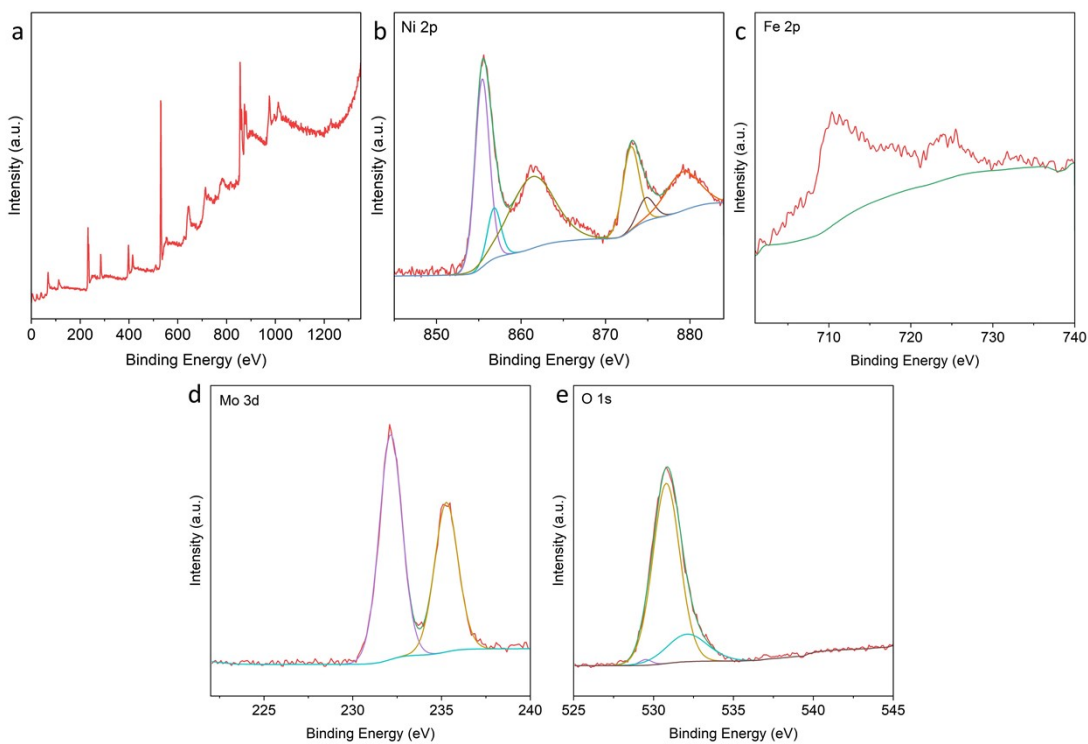

Fig. S9 (a) XPS survey and (b-e) High-resolution XPS spectra: (b) Ni 2p, (c) Fe 2p, (d) Mo 3d, and (e) O 1s of NiFeMo-3 catalyst.

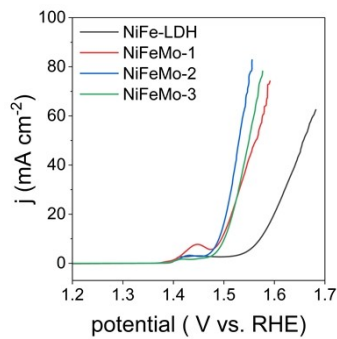

Fig. S10 positive scan LSV curves of NiFe-LDH, NiFeMo-1, NiFeMo-2 and NiFeMo-3



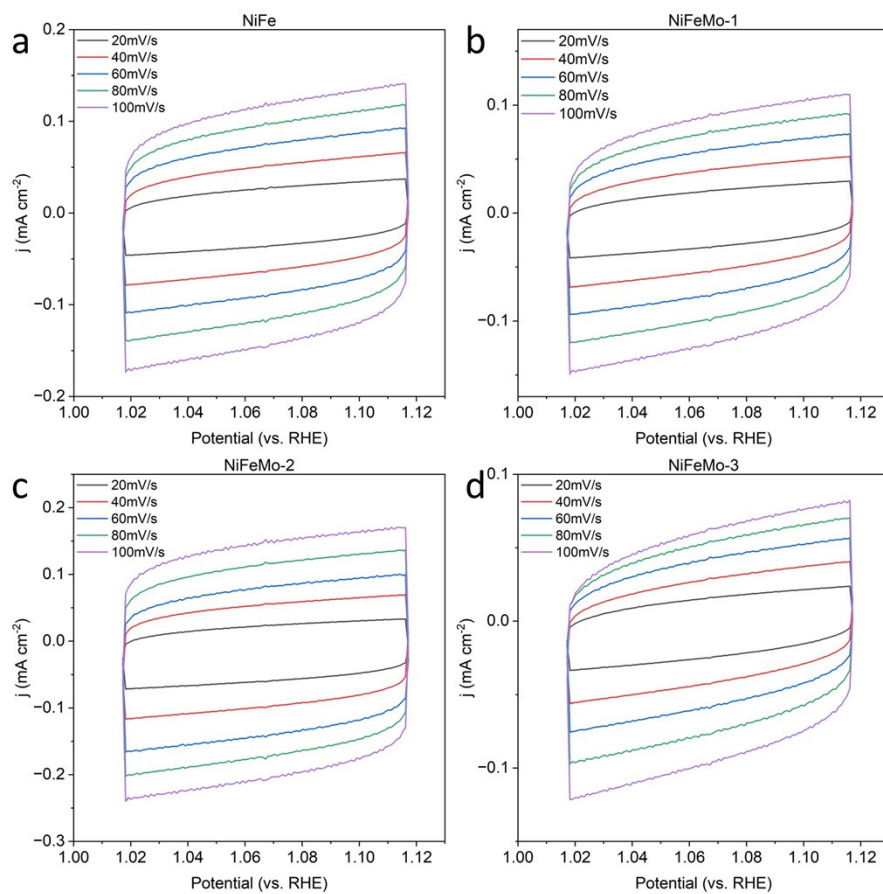

Fig. S11 ECSA curves of (a) NiFe-LDH, (b) NiFeMo-1, (c) NiFeMo-2 and (d) NiFeMo-3.

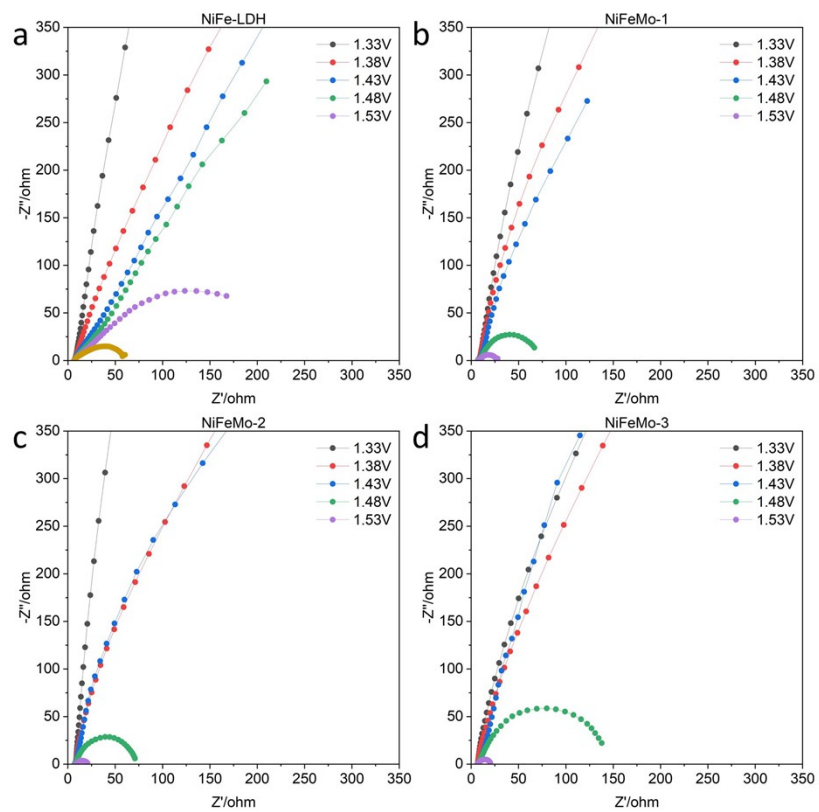

Fig. S12 (a-d) Nyquist plots of (a) NiFe-LDH, (b) NiFeMo-1, (c) NiFeMo-2 and (d) NiFeMo-3 at different potentials.

Table S1 Fitted equivalent circuit model parameters of the NiFe-LDH, NiFeMo-1, NiFeMo-2 and NiFeMo-3

| Sample   | $R_s/\Omega$ | $R1(R_{ct})/\Omega$ | CPE1/F                 | $R2/\Omega$ | CPE2/F                 |
|----------|--------------|---------------------|------------------------|-------------|------------------------|
| NiFe-LDH | 6.561        | 243.8               | $4.007 \times 10^{-3}$ | 12.09       | $3.042 \times 10^{-2}$ |
| NiFeMo-1 | 8.143        | 18.66               | $8.886 \times 10^{-3}$ | 1.628       | $3.572 \times 10^{-4}$ |
| NiFeMo-2 | 6.881        | 9.07                | $5.927 \times 10^{-3}$ | 0.4694      | $7.199 \times 10^{-5}$ |
| NiFeMo-3 | 6.497        | 11.6                | $2.894 \times 10^{-3}$ | 2.476       | $5.529 \times 10^{-4}$ |

Table S2 Comparison of the overpotentials ( $\eta_{10}$ ) and Tafel slope of NiFeMo-2 with other transition metal-based OER catalysts

| Catalysts                                                                                      | $\eta_{10}$ (mV) | Tafel slope (mV dec <sup>-1</sup> ) | Reference                                           |
|------------------------------------------------------------------------------------------------|------------------|-------------------------------------|-----------------------------------------------------|
| NiFeMo-2                                                                                       | 262              | 64.8                                | This work                                           |
| S/N-CMF@Fe <sub>x</sub> Co <sub>y</sub> Ni <sub>1-x-y</sub> -MOF                               | 296              | 53.5                                | Adv. Mater. 2023, 35, 2207888.                      |
| a-NiFeMo                                                                                       | 280              | 49                                  | Angew. Chem. Int. Ed. 2019, 58, 15772.              |
| Ni-FeNi <sub>3</sub> /Ni <sub>0.5-b</sub> Fe <sub>0.5-y</sub> Mo <sub>1.5</sub> O <sub>x</sub> | 278              | 42                                  | Small 2024, 20, 2303927.                            |
| Ni <sub>x</sub> Fe <sub>1-x</sub> -THQ                                                         | 272              | 47.9                                | Adv. Funct. Mater. 2024, 34, 2310902.               |
| FeCo <sub>0.6</sub> Ni <sub>0.4</sub> -CAT                                                     | 277              | 72                                  | Sustainable Energy Fuels, 2020,4, 4589-4597         |
| FeNi <sub>5</sub> -MOF-450                                                                     | 307              | 56.2                                | Int. J. Miner., Metall. Mater., 2023 30, 1914–1921. |
| ANC-Fe <sub>1</sub> Ni <sub>2</sub>                                                            | 266              | 39                                  | J. Energy Chem. 2022, 71, 167-173.                  |

Table S3 Comparison of the electrocatalytic stability of NiFeMo-2 with other transition metal-based OER catalysts

| Catalysts                                          | Stability | Current density (mA cm <sup>-2</sup> ) | References                            |
|----------------------------------------------------|-----------|----------------------------------------|---------------------------------------|
| NiFeMo-2                                           | 65h       | 50                                     | This work                             |
| NiFe-LDH/Sn NSs                                    | 60h       | 100                                    | Appl. Catal., B. 2024, 124073.        |
| Ni-Fe LDH nanosheets                               | 100h      | 50                                     | Chem Catal. 2022, 2(9), 2312-2327.    |
| NiFe(OH) <sub>x</sub> /(Ni, Fe)Se <sub>2</sub> /CC | 20h       | 10                                     | Small 2021, 17, 2007334.              |
| a-NiFeO <sub>x</sub> H <sub>y</sub> @NF            | 24h       | 50                                     | Adv. Funct. Mater. 2021, 31, 2009032. |
| iron rusts/Ni(OH) <sub>2</sub>                     | 30h       | 10                                     | Electrochim. Acta 2020, 353,          |



|                                             |     |    |                                     |
|---------------------------------------------|-----|----|-------------------------------------|
|                                             |     |    | 136478.                             |
| Ni <sub>0.3</sub> Fe <sub>0.7</sub> -LDH@NF | 84h | 10 | Appl. Catal., B. 2023, 323, 122091. |

### Supplementary Note 1

**In situ DEMS with <sup>18</sup>O isotope labelling.** First, the catalyst ink was prepared and dropped on a gold electrode. The <sup>18</sup>O-labelled catalyst was prepared by chronopotential test in KOH-H<sub>2</sub><sup>18</sup>O solution. Then the <sup>18</sup>O-labelled catalyst was rinsed with H<sub>2</sub><sup>16</sup>O to remove the H<sub>2</sub><sup>18</sup>O on the surface of electrode and drying, the DEMS experiments were performed. The in situ DEMS with isotope labelling was performed on electrochemical mass spectrometer purchased from Linglu Instruments (Shanghai) Co., Ltd. Typically, the test was carried out in a three-electrode cell with 1M KOH as electrolyte. The <sup>18</sup>O-labelled NiFe-LDH or NiFeMo-2 catalyst with <sup>18</sup>O-labeling, Ag/AgCl electrode prefilled with saturated KCl aqueous solution, and a Pt wire were used as working electrode, reference electrode, and counter electrode, respectively. LSV measurement was performed in KOH-H<sub>2</sub><sup>16</sup>O solution with a scan rate of 5 mV/s. In the meantime, gas products with different molecular weights were detected in real time by mass spectroscopy. The value of <sup>34</sup>O<sub>2</sub>/<sup>32</sup>O<sub>2</sub> is defined as the ratio of <sup>34</sup>O<sub>2</sub> signal to <sup>32</sup>O<sub>2</sub> signal at the onset time of oxygen evolution reaction obtained by mathematical fitting calculation.
